# Supplementary material for: Amino Acid Substitution within Seven-Octapeptide Repeat Insertions in the Prion Protein Gene Associated with Short-Term Course
Source: MDPI journal article supplement (doi:10.3390/v14102245), 2022-10-13
Supplement: s1 [file s1]

## Supplementary Materials

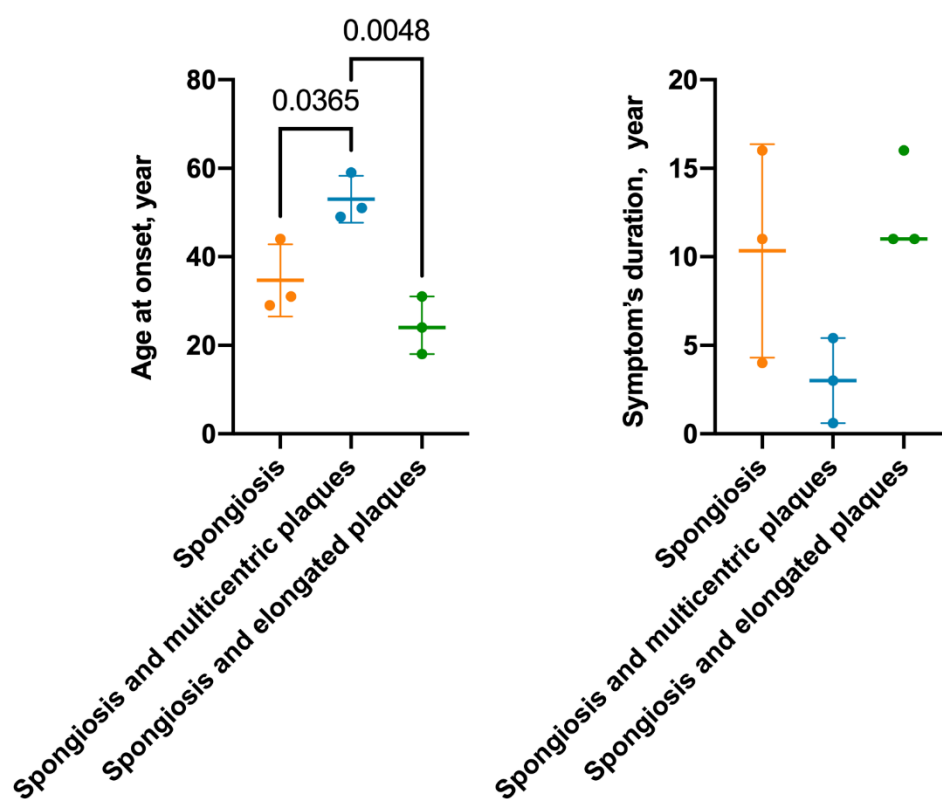

**Figure S1.** Comparison of age at onset and duration of symptoms in patient groups demarcated by pathological changes.

**Table S1.** Clinical and auxiliary characteristics of all known 17 patients carrying 7-OPRI.

| Number | Year | Country   | Gender | Family History | Age at Onset (Years) | Duration (Years) | First Symptom of Disease    | Cognitive Dysfunction | Psychiatric Disturbances                 | Parkinsonism | Cerebellar Signs | Myoclonus | Pyramidal Signs | Speech Disorders | References |
|--------|------|-----------|--------|----------------|----------------------|------------------|-----------------------------|-----------------------|------------------------------------------|--------------|------------------|-----------|-----------------|------------------|------------|
| 1      | 1991 | USA       | F      | +              | 31                   | 11               | Psychiatric disturbances    | +                     | + (Mood change, indifference, confusion) | +            | +                |           | +               | +                | [8,10]     |
| 2      |      |           | F      | +              | 23                   | 10               | Psychiatric disturbances    | +                     | + (Abnormal behavior)                    | +            | +                | +         | +               | +                |            |
| 3      |      |           | F      | +              | 28                   | 13               | Ataxia (abnormal gait)      | +                     | + (Euphoria)                             | +            | +                | +         | +               | +                |            |
| 4      | 1992 | Japan     | NA     | +              | NA                   | 7                | Cognitive dysfunction       | +                     |                                          | +            |                  |           |                 |                  | [9]        |
| 5      | 2000 | Belgium   | M      | +              | 32                   | 7                | Cognitive dysfunction       | +                     |                                          | +            |                  |           |                 |                  | [11]       |
| 6      |      |           | M      | +              | 24                   | 11               | Cognitive dysfunction       | +                     | + (Psychosis)                            | +            | +                | +         |                 |                  |            |
| 7      |      |           | F      | +              | 31                   | 11               | Ataxia                      | +                     | + (Depression/ mood change)              |              | +                |           | +               |                  |            |
| 8      | 2003 | Australia | NA     | +              | 29                   | 16               | Psychiatric disturbance and | +                     | + (Abnormal behavior)                    | +            |                  |           |                 |                  | [12]       |

|    |          |                 |    |   |     |      |                                                                           |   |   |                                                    |                                                |   |   |   |            |          |
|----|----------|-----------------|----|---|-----|------|---------------------------------------------------------------------------|---|---|----------------------------------------------------|------------------------------------------------|---|---|---|------------|----------|
|    |          |                 |    |   |     |      | cognitive<br>dysfunctio<br>n                                              |   |   |                                                    |                                                |   |   |   |            |          |
| 9  | 200<br>7 | Italy           | M  | - | 18  | 16   | Cognitive<br>dysfunctio<br>n and<br>psychiatric<br>disturbance            | + | + | (Depression,<br>psychosis,<br>bipolar<br>disorder) |                                                | + |   |   | [13,14,17] |          |
| 10 | 200<br>8 | China           | F  | + | 44  | 4.2  | Cognitive<br>dysfunctio<br>n                                              | + |   |                                                    |                                                | + | + | + | [15,16]    |          |
| 11 | 201<br>1 | Netherland<br>s | F  | + | 50  | 0.7  | Cognitive<br>dysfunctio<br>n                                              | + |   | +                                                  | (Emotional<br>lability,<br>anxiety<br>attacks) |   |   | + | +          | [7]      |
| 12 |          |                 | M  | + | 49  | 3    | Cognitive<br>dysfunctio<br>n                                              | + |   | +                                                  | (Emotional<br>lability,<br>apathetic)          | + |   |   |            |          |
| 13 |          |                 | M  | + | 59  | 0.6  | Ataxia                                                                    | + |   | +                                                  | (Apathetic)                                    | + | + | + |            |          |
| 14 |          |                 | M  | + | 51  | 5.4  | Ataxia,<br>cognitive<br>dysfunctio<br>n and<br>psychiatric<br>disturbance | + |   | +                                                  | (Depression,<br>panic<br>attacks)              | + | + | + |            |          |
| 15 | 202<br>2 | China           | NA | + | 40s | >0.6 | Cognitive<br>dysfunctio<br>n                                              | + |   | +                                                  | (Mood<br>change,<br>abnormal<br>behavior)      | + | + | + | +          | Our case |

|    |    |   |     |     |                       |   |                                    |   |   |   |   |          |
|----|----|---|-----|-----|-----------------------|---|------------------------------------|---|---|---|---|----------|
| 16 | NA | + | 60s | 5.5 | Cognitive dysfunction | + | + (Mood change, abnormal behavior) | + | + | + | + | Our case |
| 17 | NA | + | 50s | 1.5 | Cognitive dysfunction | + |                                    |   | + | + |   | Our case |

**Table S1.** Continued.

| Number | Visual Signs | Mutism | Seizure | PSWCs on EEG                                | CSF 14-3-3 Protein | CSF Tau Protein | CSF RT-QuIC | Hyperintensity on MRI | Condon 129 | Neuropathology                                 | Immunoblot | Mutation                   | Misdiagnose        | References |
|--------|--------------|--------|---------|---------------------------------------------|--------------------|-----------------|-------------|-----------------------|------------|------------------------------------------------|------------|----------------------------|--------------------|------------|
| 1      |              |        | +       | - (Diffuse slowing)                         |                    |                 |             |                       | Cis-M      | Spongiosis, gliosis, neuronal loss             |            | R2c-R3-R2-R3-R2-R3g-R2-R3g | Schizophrenia      | [8,10]     |
| 2      |              | +      |         | - (Diffuse slowing)                         |                    |                 |             |                       | Cis-M      | Mild gliosis and neuronal loss (no spongiosis) |            |                            |                    |            |
| 3      |              | +      |         | - (Paroxysmal episodes of slow wave spikes) |                    |                 |             |                       | Cis-M      |                                                |            |                            |                    |            |
| 4      |              |        |         |                                             |                    |                 |             |                       | NA         | Kuru-like plaques in the cerebellum            |            | R3-R2-R2-R2-R3g-R2-R2      |                    | [9]        |
| 5      |              |        |         |                                             |                    |                 |             |                       | Cis-M      |                                                |            | NA                         | Multiple sclerosis | [11]       |
| 6      |              |        |         |                                             |                    |                 |             |                       |            | Spongiosis, gliosis, neuronal loss, elongated  |            |                            |                    |            |

|    |   |   |                                 |   |   |                                                             |  |  |                                            |                                                                                                                  |                                                                                           |                                 |                                      |            |  |  |  |  |  |
|----|---|---|---------------------------------|---|---|-------------------------------------------------------------|--|--|--------------------------------------------|------------------------------------------------------------------------------------------------------------------|-------------------------------------------------------------------------------------------|---------------------------------|--------------------------------------|------------|--|--|--|--|--|
|    |   |   |                                 |   |   |                                                             |  |  | cerebellar<br>plaques<br>cerebellar cortex |                                                                                                                  |                                                                                           |                                 |                                      |            |  |  |  |  |  |
| 7  |   | + |                                 |   |   |                                                             |  |  | Cis-<br>M(MM)                              | Spongiosis,<br>gliosis, neuronal<br>loss, elongated<br>cerebellar<br>plaques<br>cerebellar cortex                |                                                                                           |                                 |                                      |            |  |  |  |  |  |
| 8  |   | + | - (Diffuse<br>slowing)          |   |   |                                                             |  |  | Cis-<br>M(MV)                              | Spongiosis,<br>gliosis, neuronal<br>loss, non-linear<br>granular<br>deposits<br>cerebellar cortex                | Type 1                                                                                    | R3-R2-R3-<br>R2-R2-R2-<br>R2    | Huntington's<br>disease              | [12]       |  |  |  |  |  |
| 9  | + |   | - (Diffuse<br>slowing)          | - | - | - (MRI revealed<br>widespread<br>cortical brain<br>atrophy) |  |  | Cis-<br>M(MM)                              | spongiform<br>degeneration,<br>cortical PrP<br>plaques, and<br>elongated PrP<br>formations in<br>the cerebellum. | type 1 in the<br>cerebral<br>cortex and<br>mixed types<br>1 and 2 in<br>the<br>cerebellum | R3-R2-R2-<br>R3g-R2-R2-<br>R2   | Psychosis and<br>bipolar<br>disorder | [13,14,17] |  |  |  |  |  |
| 10 | + |   | +                               |   |   | - (no<br>remarkable<br>changes)                             |  |  | Cis-<br>M(MM)                              | Spongiosis,<br>gliosis, neuronal<br>loss                                                                         | Type 1                                                                                    | R2-R2-R2-<br>R3g-R2-R3g-<br>R2a |                                      | [15,16]    |  |  |  |  |  |
| 11 |   |   |                                 |   |   |                                                             |  |  | NA                                         |                                                                                                                  |                                                                                           | NA                              |                                      | [7]        |  |  |  |  |  |
| 12 |   |   | - (Non-<br>specific<br>changes) |   |   |                                                             |  |  | NA                                         | Spongiosis +++,<br>gliosis, neuronal<br>loss,<br>multicentric<br>plaques                                         | Type 1                                                                                    | NA                              |                                      |            |  |  |  |  |  |
